# Supplementary material for: Targeting of Th17-related cytokines in patients with Darier Disease
Source: bioRxiv or medRxiv preprint supplement (doi:10.1101/2023.01.12.22283857), 2023-07-05
Supplement: Supplementary file [file media-1.pdf]

## Supplementary Figures

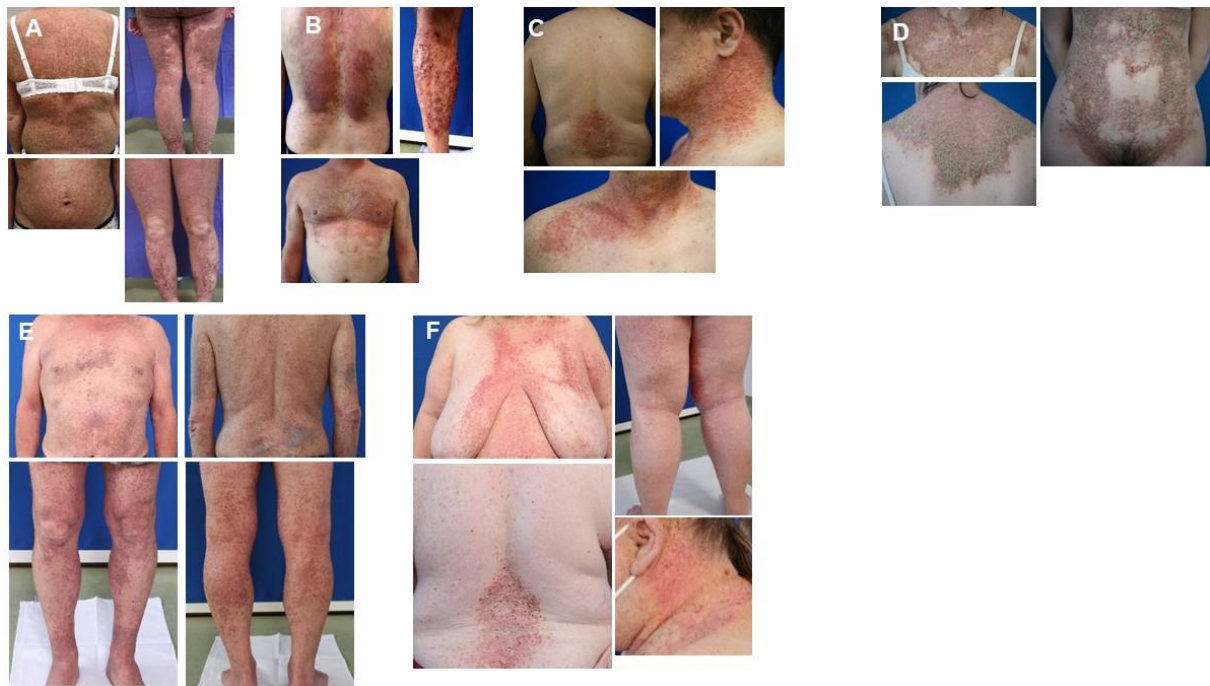

### **Supplementary Fig 1: Disease phenotype/severity**

**A** PAT1: hyperkeratotic erythematous and brownish papules and plaques on the entire integument, on legs additionally erosions and crusts (severe, >35% BSA affected). **B** PAT2: hyperkeratotic erythematous and brownish papules and plaques on the entire integument, on the legs additionally erosions and crusts (severe, >35% BSA affected). **C** PAT4: hyperkeratotic erythematous and brownish papules and plaques on the upper thorax and neck (moderate, 20% BSA affected). **D** PAT5: hyperkeratotic erythematous and brownish papules and plaques on the entire integument (severe, >35% BSA affected). **E** PAT7 hyperkeratotic erythematous and brownish papules and plaques on the entire integument (severe, >35% BSA affected). **F** PAT9: hyperkeratotic erythematous and brownish papules and plaques on the entire integument (severe, >35% BSA affected). BSA, body surface area
