# Supplementary material for: Targeting of Th17-related cytokines in patients with Darier Disease
Source: bioRxiv or medRxiv preprint supplement (doi:10.1101/2023.01.12.22283857), 2023-07-05
Supplement: Supplementary file [file media-2.pdf]

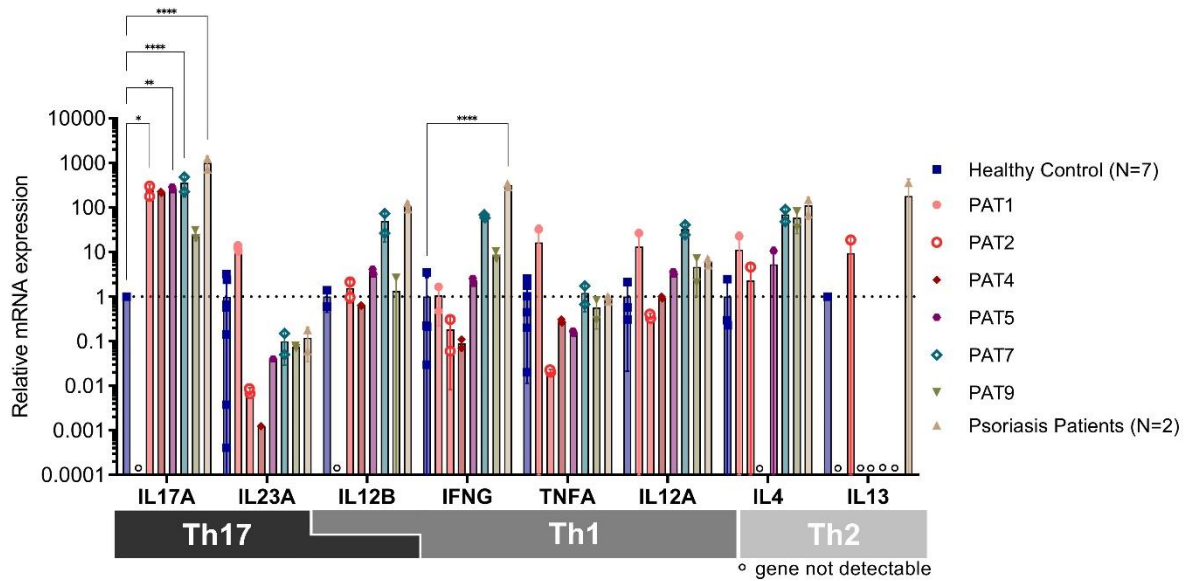

**Supplementary Fig 2: Cytokine mRNA expression of each single patient**

as determined by qPCR using probes against the indicated cytokines. Data were normalized to housekeeping gene ACTB and healthy controls. Data points of DD patients (PAT1-9) represent methodological replicates, data points of Healthy Controls and Psoriasis Patients represent means of different patients. Bars represent means, error bars represent standard deviations. ° gene not detectable. \*  $p < 0.05$ , \*\*  $p < 0.005$ , \*\*\*  $p < 0.00005$  (2-way ANOVA with Turkey's post hoc test)
