# Supplementary material for: Targeting of Th17-related cytokines in patients with Darier Disease
Source: bioRxiv or medRxiv preprint supplement (doi:10.1101/2023.01.12.22283857), 2023-07-05
Supplement: Supplementary file [file media-3.pdf]

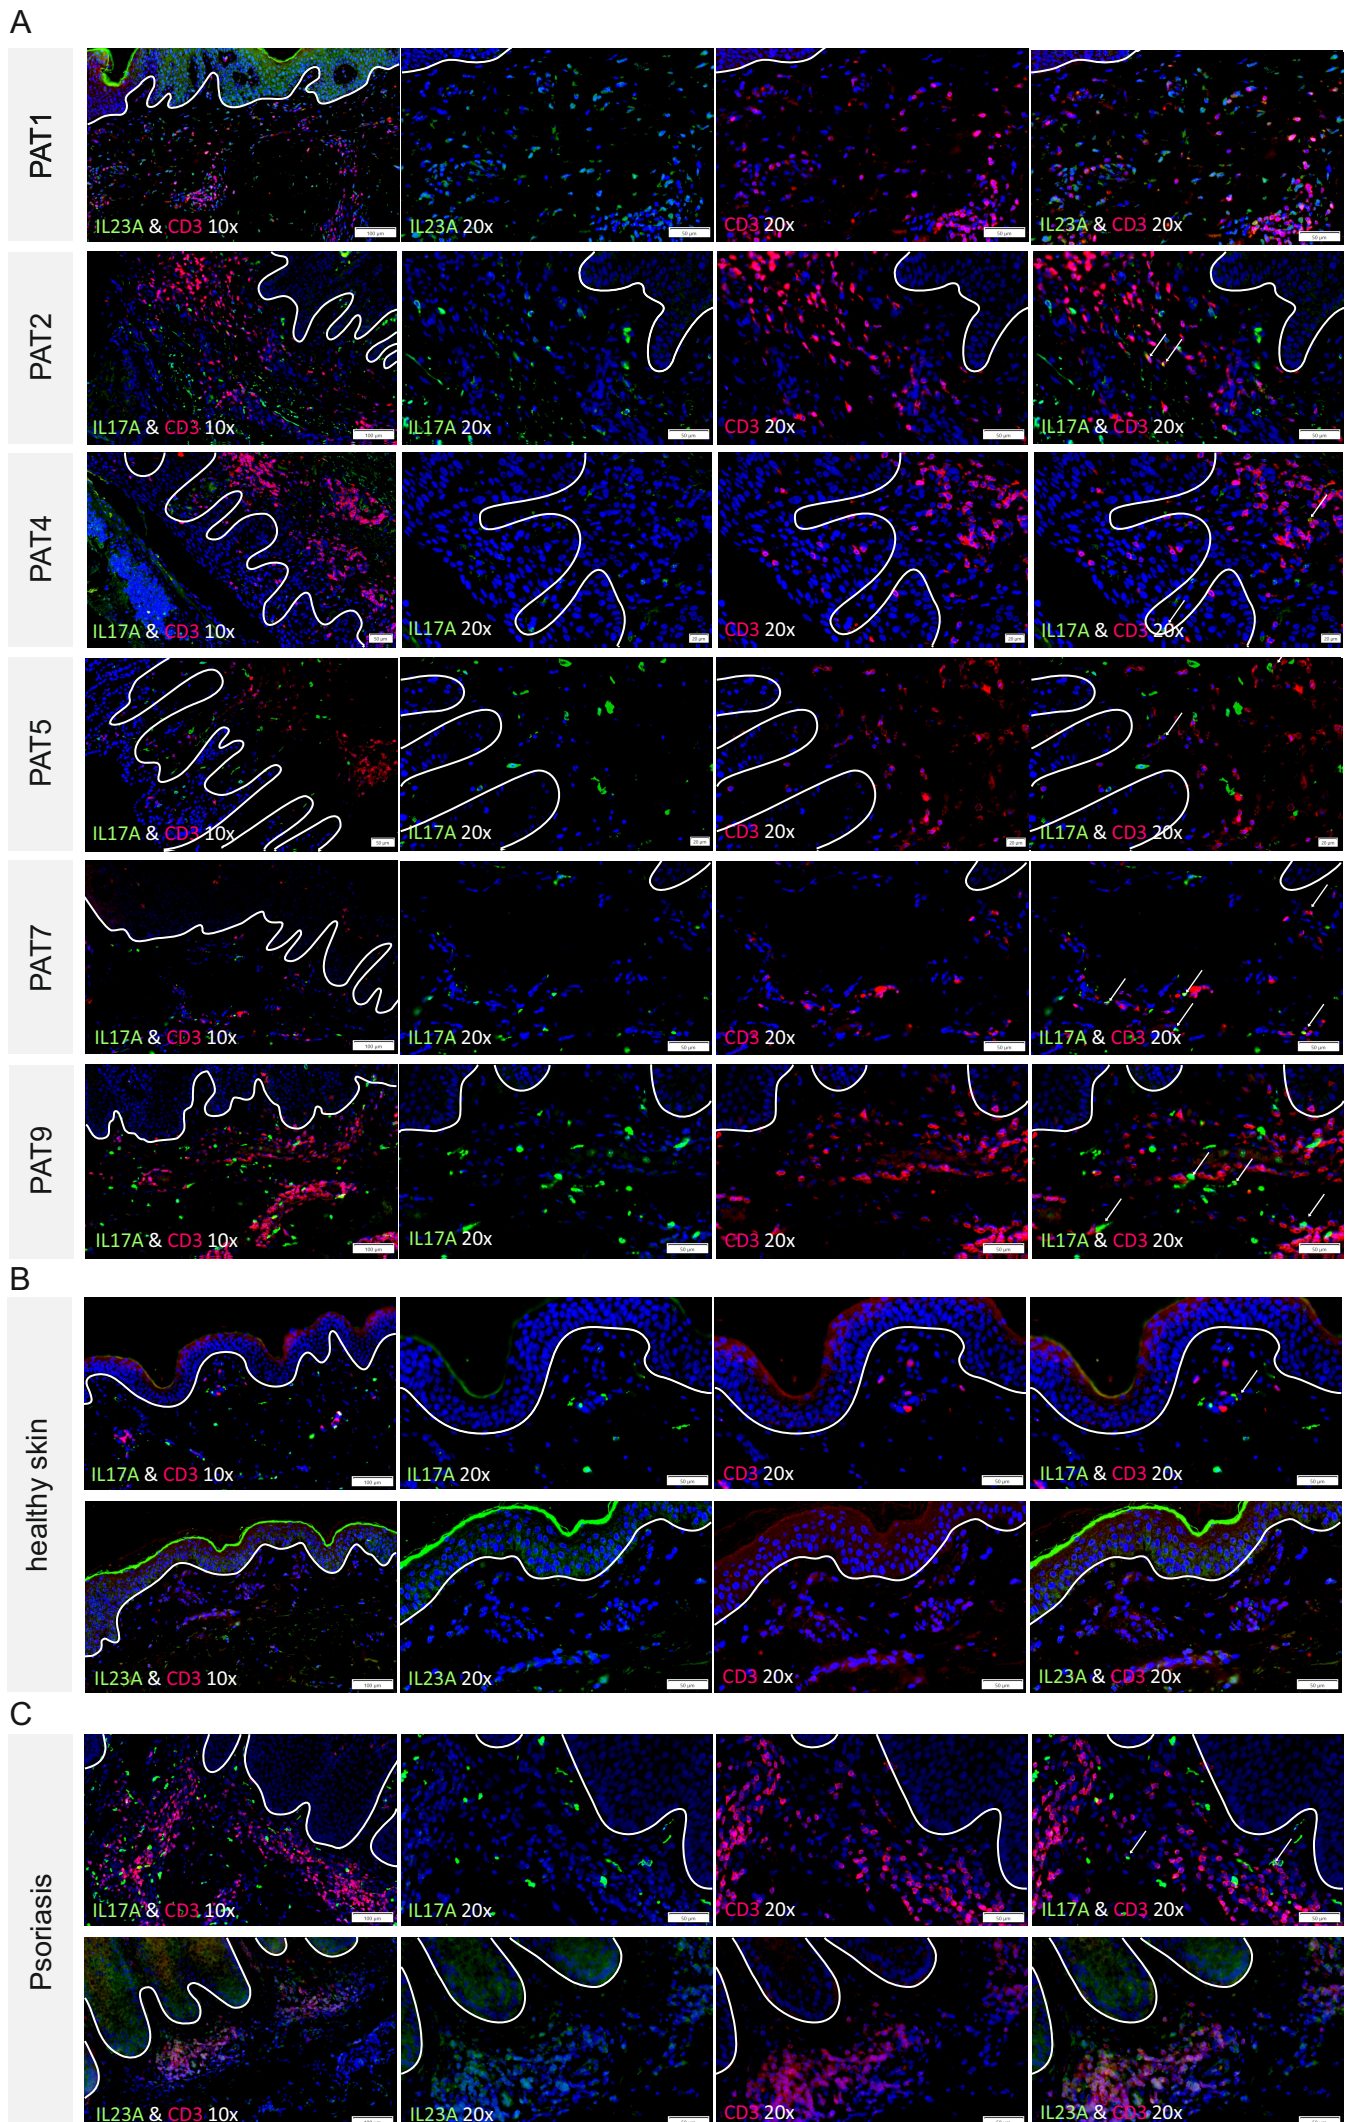

**Supplementary Fig 3: Immunofluorescence stainings of IL17A/IL23A and CD3**

**A** Skin sections were stained with antibodies against IL23A (PAT1) or IL17A (PAT2, PAT4, PAT5, PAT7, PAT9) and CD3. **B** Immunofluorescence images of IL17A+CD3 and IL23A+CD3 from healthy controls. **C** Immunofluorescence images IL17A+CD3 and IL23A+CD3 of psoriasis patients. CD3 positive T cells in red, IL17A/IL23A positive cells in green, DAPI-stained nuclei in blue. White arrows indicate IL17A/CD3 double-positive cells (supposedly Th17/Tc17 cells) in 20x magnified images. White line indicates basement membrane zone separating epidermis from the dermis.
