# Supplementary material for: Targeting of Th17-related cytokines in patients with Darier Disease
Source: bioRxiv or medRxiv preprint supplement (doi:10.1101/2023.01.12.22283857), 2023-07-05
Supplement: Supplementary file [file media-4.pdf]

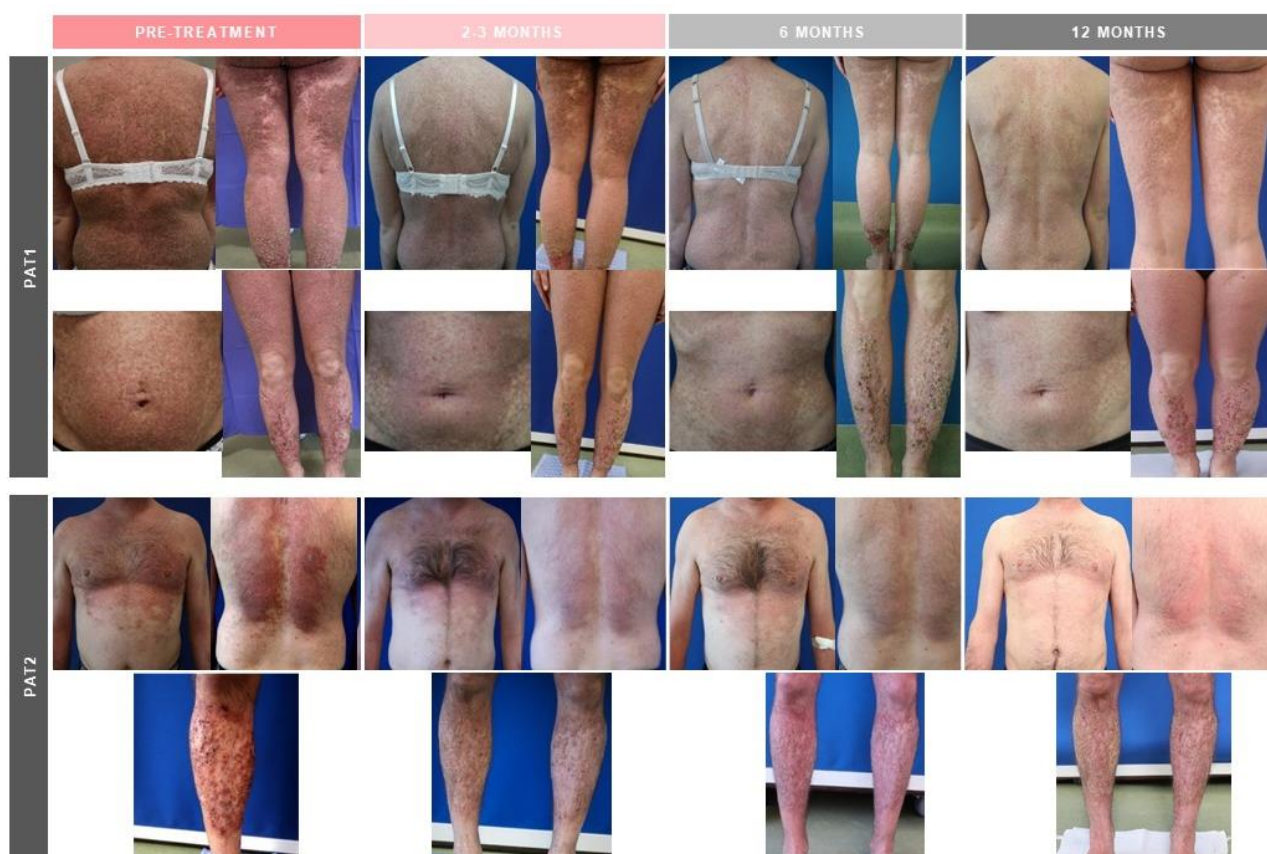

**Supplementary Fig 4: Clinical pictures during treatment process of DD PAT1 and PAT2**

**Patient 1:** Pre-treatment (prior to systemic therapy with guselkumab): erythematous and brownish hyperkeratotic papules and plaques on the entire integument, on the legs additionally crusts and erosions. 2 months post therapy: flattening of papules and plaques on the thorax, decrease of erythema. 6 months post therapy: further flattening of papules and plaques on the thorax. 12 months post treatment: flattened and reduced papules on the thorax, on the legs hyperkeratotic plaques and erythema, crusts and erosions.

**Patient 2:** Pre-treatment (before systemic therapy with secukinumab): erythematous and brownish hyperkeratotic papules and plaques on thorax and legs, on legs additionally crusts and erosions. 3 months post therapy: reduced erythema on the thorax, flattened papules on the thorax and plaques on the legs. 6 months post therapy: flattened papules on the thorax. 12 months post therapy: flattened and reduced papules on the thorax, hyperkeratotic plaques on the legs and lightened erythema.
