# Supplementary material for: Targeting of Th17-related cytokines in patients with Darier Disease
Source: bioRxiv or medRxiv preprint supplement (doi:10.1101/2023.01.12.22283857), 2023-07-05
Supplement: Supplementary file [file media-5.pdf]

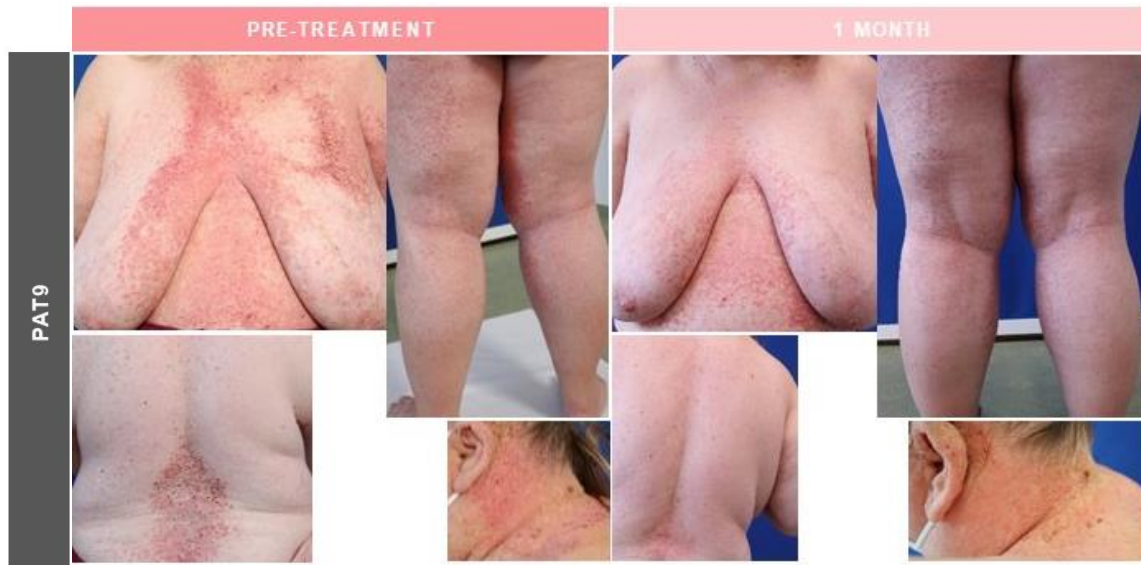

**Supplementary Fig 5: Clinical pictures during treatment process of DD PAT9**

Pre-treatment (prior to systemic therapy with secukinumab): erythematous and brownish hyperkeratotic papules and plaques on thorax, legs and face. One month post therapy: flattened plaques on thorax and legs.
