# Supplementary material for: Targeting of Th17-related cytokines in patients with Darier Disease
Source: bioRxiv or medRxiv preprint supplement (doi:10.1101/2023.01.12.22283857), 2023-07-05
Supplement: Supplementary file [file media-6.pdf]

## Supplementary Tables

### **Supplementary Table 1: Enriched Biocarta pathway gene sets in Darier Disease patients vs. Healthy Controls as determined by Gene Set Enrichment Analysis.**

IL-17 signaling pathway is highlighted in bold. FDR, false discovery rate

| Biocarta pathway name                                | No of genes in Nanostring panel | normalized enrichment score | FDR q-value |
|------------------------------------------------------|---------------------------------|-----------------------------|-------------|
| Cytokines and inflammatory response                  | 21                              | 2.1                         | 0.05        |
| Local acute inflammatory response                    | 15                              | 2.05                        | 0.07        |
| Adhesion and Diapedesis of Granulocytes              | 13                              | 2.03                        | 0.074       |
| <b>IL-17 signaling</b>                               | 12                              | 1.98                        | 0.124       |
| Cytokine Network                                     | 17                              | 1.86                        | 0.193       |
| Cytotoxic T lymphocytes                              | 11                              | 1.84                        | 0.196       |
| Regulation of hematopoiesis by cytokines             | 12                              | 1.81                        | 0.18        |
| NFkB activation by Nontypeable Hemophilus influenzae | 14                              | 1.75                        | 0.196       |
| T helper cells                                       | 10                              | 1.71                        | 0.225       |
| Adhesion and Diapedesis of Lymphocytes               | 12                              | 1.71                        | 0.207       |
| T Cytotoxic Cells                                    | 10                              | 1.68                        | 0.219       |
| Free Radical Induced Apoptosis                       | 4                               | 1.66                        | 0.216       |
| Adhesion molecules on lymphocytes                    | 9                               | 1.61                        | 0.217       |
| HIV induced T cell apoptosis                         | 7                               | 1.62                        | 0.221       |
| Co-Stimulatory Signal During T-cell Activation       | 13                              | 1.6                         | 0.212       |
| Monocytes and its Surface Molecules                  | 10                              | 1.56                        | 0.226       |
