# Supplementary material for: Targeting of Th17-related cytokines in patients with Darier Disease
Source: bioRxiv or medRxiv preprint supplement (doi:10.1101/2023.01.12.22283857), 2023-07-05
Supplement: Supplementary file [file media-7.pdf]

**Supplementary Table 2: Enriched Biocarta pathway gene sets in Psoriasis patients vs. Healthy Controls as determined by Gene Set Enrichment Analysis.**

Pathways that are also enriched in Darier Disease patients are highlighted in bold. FDR, false discovery rate

| Biocarta pathway name                                              | No of genes in Nanostring panel | normalized enrichment score | FDR q-value |
|--------------------------------------------------------------------|---------------------------------|-----------------------------|-------------|
| <b>IL-17 signaling</b>                                             | 12                              | 2.32                        | 0.174       |
| <b>Cytokine Network</b>                                            | 17                              | 2.27                        | 0.174       |
| <b>Regulation of hematopoiesis by cytokines</b>                    | 12                              | 2.11                        | 0.174       |
| <b>NFkB activation by Nontypeable Hemophilus influenzae</b>        | 14                              | 2.06                        | 0.174       |
| <b>Cytokines and inflammatory response</b>                         | 21                              | 1.82                        | 0.174       |
| <b>Free Radical Induced Apoptosis</b>                              | 4                               | 1.82                        | 0.174       |
| IL22 Soluble Receptor Signaling                                    | 9                               | 1.76                        | 0.174       |
| <b>Adhesion and Diapedesis of Granulocytes</b>                     | 13                              | 1.74                        | 0.174       |
| Mechanism of Gene Regulation by Peroxisome Proliferators via PPARa | 8                               | 1.72                        | 0.174       |
| <b>Local accute inflammatory response</b>                          | 15                              | 1.6                         | 0.224       |
| <b>Adhesion and Diapedesis of Lymphocytes</b>                      | 12                              | 1.59                        | 0.22        |
| Antigen Processing and Presentation                                | 11                              | 1.52                        | 0.231       |
